# Supplementary material
Source: publisher figshare collection journal article supplement (https://tandf.figshare.com/ndownloader/files/13207592)
Supplement: Supplementary file 1 [file 13207592]

Table S1：The primers used in this study.

| Target gene | Primer | Sequence |
| --- | --- | --- |
| LePR5 | P1 | 3’-GGATCCGTGATTGTGGTGGAGTCTTGGA-5’ |
| P2 | 3’-GTCGACACATGGACCTTGAGTGCAACA-5’ |
| LePR5 | NP1 | 5’-GTTCTTTTTGTCAAGACCGACC-3’ |
| NP2 | 5’-CAAGCTCTTCAGCAATATATCACG-3’ |
| LePR5 | F1 | 5'-GTGATTGTGGTGGAGTCTTGGA-3' |
| F2 | 5'-ATAGGCATCGGGACATCTTTG-3' |
| GAPDH | G1 | 5'-CGGCTCCATTTTCCTTCT-3' |
| G2 | 5'-GGGATTTCCTCTGGGTTTC-3' |
| LePR5 | XP1 | 5’-CCCCCCGGGATGAGTCATTTGACAACTTGTTTAG-3’ |
| BP2 | 5’-CGGGATCCAGCCACTTCAAAAGTATTTGTAGG-3’ |

Fig. S1

*Xma* I

*Bam*H I

NPT II CaMV35S promoter CaMV35 LePR5 GFP OCS

Fig. S1 Schematic plot of plant expression vector pCAMBIA2300-GFP-LePR5.

Fig. S2

A:

*Xba* I

**CaMV35S**

**LePR-5**

**intron**

LePR-5

**NOS T**

**NOS T**

***NPTⅡ***

NOS P

*Bam*HI

*Sac* I

M 1 2 3 4 5 6 7 8 9 10

B:


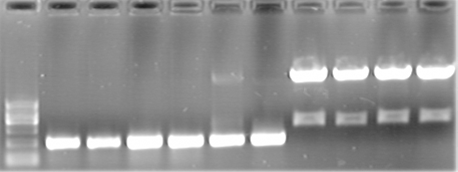


300

500

100

500

700

900

1200

M 1 2 3

C:

800

1200

900

700

500

300

100

D:


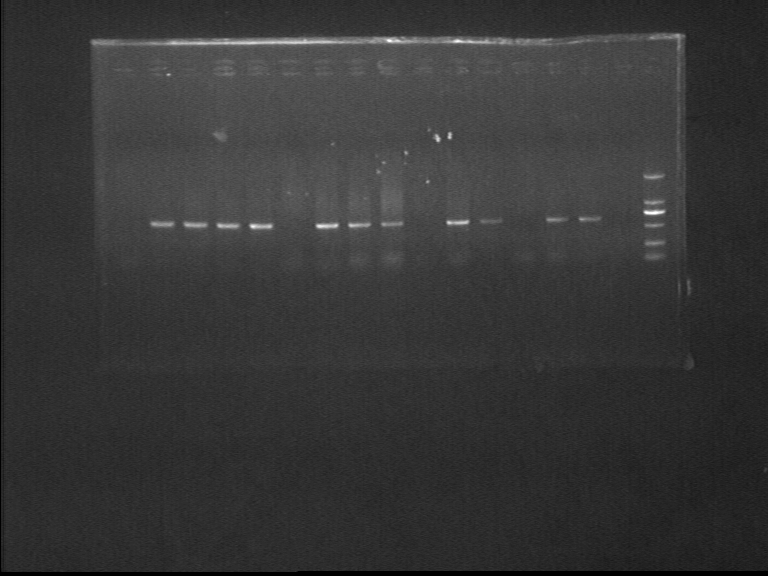


C 1 2 3 4 5 6 7 8 9 10 11 12 13 14 Mark

2000

1000

750

500

250

100

Fig. S2 Schematic plot and clone fragment of tomato Interference expression vector pBIA-LePR5-RNAi. A, Schematic plot of tomato Interference expression vector pBIA-LePR5-RNAi. The gene fragment contained interference expression vector was obtained by PCR. B, Confirmation of Pucc-LePR-5 by PCR and enzyme. M: Marker II; line 1: PCR result of Positive control; line 2 to 6: PCR results of Pucc-LePR-5; line 7 to 10: *Pst* I digestion results of Pucc-LePR-5; C, Confirmation of Pucc-2LePR-5 by enzyme. M: Marker II; line 1 to 3: *Pst* I digestion results of Pucc-2LePR-5. D, Gels electrophoresis of PCR amplification in resistant tomato plants. C: wild type tomato; Mark: DL2000; line 1 to 10: PCR products amplified from resistant genomic DNA of tomato plants transgenic with pBIA-LePR5-RNAi; line 11 to 14: PCR products amplified from resistant genomic DNA of tomato plants transgenic with pCAMBIA2301
